# Supplementary material
Source: publisher figshare collection journal article supplement (https://acs.figshare.com/ndownloader/files/5740557)
Supplement: Supplementary file 1 [file 5740557]

  
data_cwd115t 
  
_audit_creation_method            SHELXL-97 
_chemical_name_systematic 
; 
 ? 
; 
_chemical_name_common             ? 
_chemical_melting_point           ? 
_chemical_formula_moiety          ? 
_chemical_formula_sum 
 'C13 H14 Cl N O2 S2' 
_chemical_formula_weight          315.82 
  
loop_ 
 _atom_type_symbol 
 _atom_type_description 
 _atom_type_scat_dispersion_real 
 _atom_type_scat_dispersion_imag 
 _atom_type_scat_source 
 'C'  'C'   0.0033   0.0016 
 'International Tables Vol C Tables 4.2.6.8 and 6.1.1.4' 
 'H'  'H'   0.0000   0.0000 
 'International Tables Vol C Tables 4.2.6.8 and 6.1.1.4' 
 'N'  'N'   0.0061   0.0033 
 'International Tables Vol C Tables 4.2.6.8 and 6.1.1.4' 
 'O'  'O'   0.0106   0.0060 
 'International Tables Vol C Tables 4.2.6.8 and 6.1.1.4' 
 'S'  'S'   0.1246   0.1234 
 'International Tables Vol C Tables 4.2.6.8 and 6.1.1.4' 
 'Cl'  'Cl'   0.1484   0.1585 
 'International Tables Vol C Tables 4.2.6.8 and 6.1.1.4' 
  
_symmetry_cell_setting            Monoclinic 
_symmetry_space_group_name_H-M    P2(1) 
  
loop_ 
 _symmetry_equiv_pos_as_xyz 
 'x, y, z' 
 '-x, y+1/2, -z' 
  
_cell_length_a                    7.6850(10) 
_cell_length_b                    8.4184(11) 
_cell_length_c                    11.5718(15) 
_cell_angle_alpha                 90.00 
_cell_angle_beta                  91.589(2) 
_cell_angle_gamma                 90.00 
_cell_volume                      748.35(17) 
_cell_formula_units_Z             2 
_cell_measurement_temperature     213(2) 
_cell_measurement_reflns_used     ? 
_cell_measurement_theta_min       ? 
_cell_measurement_theta_max       ? 
  
_exptl_crystal_description        prism 
_exptl_crystal_colour             yellow 
_exptl_crystal_size_max           .17 
_exptl_crystal_size_mid           .2 
_exptl_crystal_size_min           .2 
_exptl_crystal_density_meas       ? 
_exptl_crystal_density_diffrn     1.402 
_exptl_crystal_density_method     'not measured' 
_exptl_crystal_F_000              328 
_exptl_absorpt_coefficient_mu     0.530 
_exptl_absorpt_correction_type    none 
_exptl_absorpt_correction_T_min   ? 
_exptl_absorpt_correction_T_max   ? 
_exptl_absorpt_process_details    ? 
  
_exptl_special_details 
; 
 ? 
; 
  
_diffrn_ambient_temperature       213(2) 
_diffrn_radiation_wavelength      0.71073 
_diffrn_radiation_type            MoK\a 
_diffrn_radiation_source          'fine-focus sealed tube' 
_diffrn_radiation_monochromator   graphite 
_diffrn_measurement_device_type   'CCD area detector' 
_diffrn_measurement_method        'phi and omega scans' 
_diffrn_detector_area_resol_mean  ? 
_diffrn_standards_number          ? 
_diffrn_standards_interval_count  ? 
_diffrn_standards_interval_time   ? 
_diffrn_standards_decay_%         ? 
_diffrn_reflns_number             4976 
_diffrn_reflns_av_R_equivalents   0.0288 
_diffrn_reflns_av_sigmaI/netI     0.0265 
_diffrn_reflns_limit_h_min        -8 
_diffrn_reflns_limit_h_max        10 
_diffrn_reflns_limit_k_min        -9 
_diffrn_reflns_limit_k_max        11 
_diffrn_reflns_limit_l_min        -15 
_diffrn_reflns_limit_l_max        13 
_diffrn_reflns_theta_min          1.76 
_diffrn_reflns_theta_max          28.26 
_reflns_number_total              3235 
_reflns_number_gt                 2972 
_reflns_threshold_expression      >2sigma(I) 
  
_computing_data_collection        'Bruker SMART' 
_computing_cell_refinement        'Bruker SMART' 
_computing_data_reduction         'Bruker SAINT' 
_computing_structure_solution     'SHELXS-97 (Sheldrick, 1990)' 
_computing_structure_refinement   'SHELXL-97 (Sheldrick, 1997)' 
_computing_molecular_graphics     'Bruker SHELXTL' 
_computing_publication_material   'Bruker SHELXTL' 
  
_refine_special_details 
; 
 Refinement of F^2^ against ALL reflections.  The weighted R-factor wR and 
 goodness of fit S are based on F^2^, conventional R-factors R are based 
 on F, with F set to zero for negative F^2^. The threshold expression of 
 F^2^ > 2sigma(F^2^) is used only for calculating R-factors(gt) etc. and is 
 not relevant to the choice of reflections for refinement.  R-factors based 
 on F^2^ are statistically about twice as large as those based on F, and R- 
 factors based on ALL data will be even larger. 
; 
  
_refine_ls_structure_factor_coef  Fsqd 
_refine_ls_matrix_type            full 
_refine_ls_weighting_scheme       calc 
_refine_ls_weighting_details 
 'calc w=1/[\s^2^(Fo^2^)+(0.0585P)^2^+0.1019P] where P=(Fo^2^+2Fc^2^)/3' 
_atom_sites_solution_primary      direct 
_atom_sites_solution_secondary    difmap 
_atom_sites_solution_hydrogens    geom 
_refine_ls_hydrogen_treatment     mixed 
_refine_ls_extinction_method      none 
_refine_ls_extinction_coef        ? 
_refine_ls_abs_structure_details 
 'Flack H D (1983), Acta Cryst. A39, 876-881' 
_refine_ls_abs_structure_Flack    0.07(7) 
_refine_ls_number_reflns          3235 
_refine_ls_number_parameters      172 
_refine_ls_number_restraints      1 
_refine_ls_R_factor_all           0.0410 
_refine_ls_R_factor_gt            0.0366 
_refine_ls_wR_factor_ref          0.0973 
_refine_ls_wR_factor_gt           0.0941 
_refine_ls_goodness_of_fit_ref    1.055 
_refine_ls_restrained_S_all       1.054 
_refine_ls_shift/su_max           0.000 
_refine_ls_shift/su_mean          0.000 
  
loop_ 
 _atom_site_label 
 _atom_site_type_symbol 
 _atom_site_fract_x 
 _atom_site_fract_y 
 _atom_site_fract_z 
 _atom_site_U_iso_or_equiv 
 _atom_site_adp_type 
 _atom_site_occupancy 
 _atom_site_symmetry_multiplicity 
 _atom_site_calc_flag 
 _atom_site_refinement_flags 
 _atom_site_disorder_assembly 
 _atom_site_disorder_group 
S1 S 0.23971(7) 0.20355(9) 0.45745(5) 0.05019(18) Uani 1 1 d . . . 
S2 S -0.10291(8) 0.13875(11) 0.55445(6) 0.0571(2) Uani 1 1 d . . . 
Cl1 Cl -0.55723(11) -0.25644(12) 0.22931(8) 0.0798(3) Uani 1 1 d . . . 
N1 N -0.0758(2) 0.2644(2) 0.35435(16) 0.0355(4) Uani 1 1 d . . . 
O1 O -0.1041(3) 0.4246(2) 0.19923(16) 0.0480(4) Uani 1 1 d . . . 
C8 C -0.1100(3) 0.0486(3) 0.11704(17) 0.0328(4) Uani 1 1 d . . . 
C1 C 0.0257(3) 0.2062(3) 0.44383(18) 0.0368(4) Uani 1 1 d . . . 
C7 C 0.0409(3) 0.1520(3) 0.08082(18) 0.0361(4) Uani 1 1 d . . . 
H7A H -0.0015 0.2331 0.0249 0.043 Uiso 1 1 calc R . . 
O2 O 0.1758(2) 0.0613(2) 0.03083(14) 0.0451(4) Uani 1 1 d . . . 
H2A H 0.1422 0.0283 -0.0336 0.068 Uiso 1 1 calc R . . 
C5 C 0.1266(3) 0.2349(3) 0.18762(19) 0.0356(4) Uani 1 1 d . . . 
H5A H 0.1761 0.1531 0.2404 0.043 Uiso 1 1 calc R . . 
C9 C -0.2811(3) 0.0933(3) 0.0915(2) 0.0389(5) Uani 1 1 d . . . 
H9A H -0.3033 0.1876 0.0501 0.047 Uiso 1 1 calc R . . 
C4 C -0.0198(3) 0.3195(3) 0.2470(2) 0.0369(5) Uani 1 1 d . . . 
C10 C -0.4195(3) 0.0000(3) 0.1264(2) 0.0458(6) Uani 1 1 d . . . 
H10A H -0.5351 0.0299 0.1089 0.055 Uiso 1 1 calc R . . 
C11 C -0.3832(3) -0.1368(3) 0.1869(2) 0.0455(6) Uani 1 1 d . . . 
C13 C -0.0786(3) -0.0908(3) 0.1790(2) 0.0374(5) Uani 1 1 d . . . 
H13A H 0.0366 -0.1218 0.1966 0.045 Uiso 1 1 calc R . . 
C3 C -0.2601(3) 0.2932(3) 0.3840(2) 0.0471(6) Uani 1 1 d . . . 
H3A H -0.3365 0.2872 0.3149 0.056 Uiso 1 1 calc R . . 
H3B H -0.2735 0.3979 0.4198 0.056 Uiso 1 1 calc R . . 
C6 C 0.2706(4) 0.3518(3) 0.1561(3) 0.0535(7) Uani 1 1 d . . . 
H6A H 0.3193 0.3998 0.2260 0.080 Uiso 1 1 calc R . . 
H6B H 0.2223 0.4341 0.1061 0.080 Uiso 1 1 calc R . . 
H6C H 0.3614 0.2956 0.1163 0.080 Uiso 1 1 calc R . . 
C2 C -0.3022(3) 0.1615(5) 0.4688(2) 0.0604(8) Uani 1 1 d . . . 
H2B H -0.3322 0.0628 0.4280 0.072 Uiso 1 1 calc R . . 
H2C H -0.3991 0.1919 0.5174 0.072 Uiso 1 1 calc R . . 
C12 C -0.2155(3) -0.1845(3) 0.2151(2) 0.0444(5) Uani 1 1 d . . . 
H12A H -0.1945 -0.2781 0.2575 0.053 Uiso 1 1 calc R . . 
  
loop_ 
 _atom_site_aniso_label 
 _atom_site_aniso_U_11 
 _atom_site_aniso_U_22 
 _atom_site_aniso_U_33 
 _atom_site_aniso_U_23 
 _atom_site_aniso_U_13 
 _atom_site_aniso_U_12 
S1 0.0359(3) 0.0702(5) 0.0438(3) 0.0091(3) -0.0097(2) 0.0010(3) 
S2 0.0451(3) 0.0870(5) 0.0393(3) 0.0156(3) 0.0002(2) -0.0009(3) 
Cl1 0.0673(4) 0.0952(7) 0.0773(5) 0.0118(5) 0.0061(4) -0.0440(5) 
N1 0.0340(8) 0.0374(10) 0.0348(9) -0.0013(8) -0.0039(7) 0.0030(7) 
O1 0.0621(11) 0.0386(9) 0.0429(9) 0.0049(8) -0.0083(8) 0.0097(8) 
C8 0.0338(10) 0.0364(11) 0.0281(9) -0.0044(8) -0.0010(8) -0.0015(8) 
C1 0.0395(10) 0.0376(11) 0.0329(10) -0.0002(10) -0.0032(8) -0.0005(9) 
C7 0.0350(9) 0.0420(12) 0.0313(9) 0.0027(9) -0.0007(7) -0.0018(9) 
O2 0.0358(8) 0.0639(11) 0.0356(8) -0.0052(8) 0.0024(6) 0.0011(8) 
C5 0.0360(9) 0.0355(11) 0.0350(10) 0.0048(9) -0.0029(8) -0.0053(8) 
C9 0.0363(10) 0.0401(12) 0.0401(11) 0.0002(10) -0.0047(8) 0.0008(9) 
C4 0.0442(12) 0.0305(10) 0.0355(10) 0.0002(9) -0.0087(9) -0.0037(9) 
C10 0.0326(11) 0.0567(16) 0.0480(13) -0.0070(12) 0.0007(9) -0.0039(10) 
C11 0.0441(12) 0.0515(14) 0.0412(12) -0.0058(11) 0.0055(9) -0.0188(11) 
C13 0.0377(10) 0.0366(12) 0.0377(11) -0.0016(9) -0.0011(9) 0.0032(9) 
C3 0.0354(11) 0.0614(17) 0.0440(13) -0.0081(12) -0.0058(9) 0.0106(10) 
C6 0.0489(14) 0.0501(15) 0.0612(16) 0.0091(13) -0.0022(12) -0.0196(12) 
C2 0.0372(11) 0.092(2) 0.0514(14) 0.0057(15) -0.0001(10) -0.0043(13) 
C12 0.0555(14) 0.0374(12) 0.0402(12) 0.0013(10) 0.0004(10) -0.0063(10) 
  
_geom_special_details 
; 
 All esds (except the esd in the dihedral angle between two l.s. planes) 
 are estimated using the full covariance matrix.  The cell esds are taken 
 into account individually in the estimation of esds in distances, angles 
 and torsion angles; correlations between esds in cell parameters are only 
 used when they are defined by crystal symmetry.  An approximate (isotropic) 
 treatment of cell esds is used for estimating esds involving l.s. planes. 
; 
  
loop_ 
 _geom_bond_atom_site_label_1 
 _geom_bond_atom_site_label_2 
 _geom_bond_distance 
 _geom_bond_site_symmetry_2 
 _geom_bond_publ_flag 
S1 C1 1.648(2) . ? 
S2 C1 1.735(2) . ? 
S2 C2 1.811(3) . ? 
Cl1 C11 1.755(2) . ? 
N1 C1 1.370(3) . ? 
N1 C4 1.405(3) . ? 
N1 C3 1.486(3) . ? 
O1 C4 1.220(3) . ? 
C8 C9 1.391(3) . ? 
C8 C13 1.393(3) . ? 
C8 C7 1.518(3) . ? 
C7 O2 1.423(3) . ? 
C7 C5 1.550(3) . ? 
C5 C4 1.513(3) . ? 
C5 C6 1.532(3) . ? 
C9 C10 1.392(3) . ? 
C10 C11 1.373(4) . ? 
C11 C12 1.381(4) . ? 
C13 C12 1.388(3) . ? 
C3 C2 1.522(4) . ? 
  
loop_ 
 _geom_angle_atom_site_label_1 
 _geom_angle_atom_site_label_2 
 _geom_angle_atom_site_label_3 
 _geom_angle 
 _geom_angle_site_symmetry_1 
 _geom_angle_site_symmetry_3 
 _geom_angle_publ_flag 
C1 S2 C2 92.99(12) . . ? 
C1 N1 C4 127.17(19) . . ? 
C1 N1 C3 114.23(19) . . ? 
C4 N1 C3 117.90(18) . . ? 
C9 C8 C13 119.1(2) . . ? 
C9 C8 C7 120.7(2) . . ? 
C13 C8 C7 120.13(19) . . ? 
N1 C1 S1 128.56(18) . . ? 
N1 C1 S2 110.52(15) . . ? 
S1 C1 S2 120.84(13) . . ? 
O2 C7 C8 112.06(19) . . ? 
O2 C7 C5 105.55(16) . . ? 
C8 C7 C5 110.42(17) . . ? 
C4 C5 C6 110.9(2) . . ? 
C4 C5 C7 105.64(16) . . ? 
C6 C5 C7 113.15(19) . . ? 
C8 C9 C10 120.8(2) . . ? 
O1 C4 N1 117.9(2) . . ? 
O1 C4 C5 121.9(2) . . ? 
N1 C4 C5 119.77(19) . . ? 
C11 C10 C9 118.4(2) . . ? 
C10 C11 C12 122.7(2) . . ? 
C10 C11 Cl1 118.6(2) . . ? 
C12 C11 Cl1 118.7(2) . . ? 
C8 C13 C12 120.8(2) . . ? 
N1 C3 C2 104.5(2) . . ? 
C3 C2 S2 103.80(18) . . ? 
C11 C12 C13 118.3(2) . . ? 
  
loop_ 
 _geom_torsion_atom_site_label_1 
 _geom_torsion_atom_site_label_2 
 _geom_torsion_atom_site_label_3 
 _geom_torsion_atom_site_label_4 
 _geom_torsion 
 _geom_torsion_site_symmetry_1 
 _geom_torsion_site_symmetry_2 
 _geom_torsion_site_symmetry_3 
 _geom_torsion_site_symmetry_4 
 _geom_torsion_publ_flag 
C4 N1 C1 S1 7.9(4) . . . . ? 
C3 N1 C1 S1 -162.2(2) . . . . ? 
C4 N1 C1 S2 -175.45(18) . . . . ? 
C3 N1 C1 S2 14.4(3) . . . . ? 
C2 S2 C1 N1 8.5(2) . . . . ? 
C2 S2 C1 S1 -174.56(19) . . . . ? 
C9 C8 C7 O2 -134.8(2) . . . . ? 
C13 C8 C7 O2 46.8(3) . . . . ? 
C9 C8 C7 C5 107.9(2) . . . . ? 
C13 C8 C7 C5 -70.6(3) . . . . ? 
O2 C7 C5 C4 -175.06(18) . . . . ? 
C8 C7 C5 C4 -53.8(2) . . . . ? 
O2 C7 C5 C6 63.4(2) . . . . ? 
C8 C7 C5 C6 -175.3(2) . . . . ? 
C13 C8 C9 C10 -0.4(4) . . . . ? 
C7 C8 C9 C10 -178.9(2) . . . . ? 
C1 N1 C4 O1 -149.0(2) . . . . ? 
C3 N1 C4 O1 20.8(3) . . . . ? 
C1 N1 C4 C5 38.6(3) . . . . ? 
C3 N1 C4 C5 -151.6(2) . . . . ? 
C6 C5 C4 O1 61.1(3) . . . . ? 
C7 C5 C4 O1 -61.9(3) . . . . ? 
C6 C5 C4 N1 -126.8(2) . . . . ? 
C7 C5 C4 N1 110.2(2) . . . . ? 
C8 C9 C10 C11 0.2(4) . . . . ? 
C9 C10 C11 C12 0.5(4) . . . . ? 
C9 C10 C11 Cl1 -179.1(2) . . . . ? 
C9 C8 C13 C12 0.0(3) . . . . ? 
C7 C8 C13 C12 178.5(2) . . . . ? 
C1 N1 C3 C2 -34.8(3) . . . . ? 
C4 N1 C3 C2 154.1(2) . . . . ? 
N1 C3 C2 S2 37.3(2) . . . . ? 
C1 S2 C2 C3 -27.2(2) . . . . ? 
C10 C11 C12 C13 -0.9(4) . . . . ? 
Cl1 C11 C12 C13 178.65(19) . . . . ? 
C8 C13 C12 C11 0.6(4) . . . . ? 
  
_diffrn_measured_fraction_theta_max    0.977 
_diffrn_reflns_theta_full              28.26 
_diffrn_measured_fraction_theta_full   0.977 
_refine_diff_density_max    0.270 
_refine_diff_density_min   -0.169 
_refine_diff_density_rms    0.044 
  
